# Supplementary material for: Polyamine-functionalized imidazolyl poly(ionic liquid)s for the efficient conversion of CO2 into cyclic carbonates
Source: Royal Society of Chemistry journal article supplement (doi:10.1039/d1cy01765a), 2021-11-09
Supplement: d1cy01765a1.pdf [file d1cy01765a1.pdf]

# Supporting Information

## Polyamine Functionalized Imidazolyl Poly(ionic liquid)s for the Efficient Conversion of CO<sub>2</sub> into Cyclic Carbonates

Yizhen Zou, Yuansheng Ge, Qiang Zhang, Wei Liu, Xiaoguang Li, Guoe Cheng and Hanzhong Ke

\*

*Faculty of Materials Science and Chemistry, China University of Geosciences (Wuhan), 388 Lumo Road, Wuhan 430074, China.*

### Table of Contents

|                                                                      |    |
|----------------------------------------------------------------------|----|
| General information.....                                             | 1  |
| XRD and TGA of N <sub>4</sub> -PIL-2.....                            | 2  |
| The <sup>1</sup> H NMR spectrums.....                                | 3  |
| Comparisons of the catalytic activity of N <sub>4</sub> -PIL-2. .... | 8  |
| Cartesian Coordinates (Å) of the Optimized Structures. ....          | 10 |
| References.....                                                      | 14 |

### General information

All the epoxide substrates used were of analytical grade, and sourced from Energy Chemical of Anhui Zesheng Technology Co., Ltd. (Shanghai, China). Divinylbenzene (DVB) and solvents were purchased from Sinopharm Chemical Reagent Co., Ltd. DVB was treated to remove the polymerization inhibitor before use. All the solvents were used as received without further purification.

Micromeritics ASAP 2460 system was operated to measure nitrogen adsorption and desorption isotherms at the liquid-nitrogen temperature of 77 K, the samples were degassed in vacuum at 120 °C for 10 h before analysis, their surface areas and pore size distribution, pore volumes of samples were calculated by the Brunauer–Emmett–Teller (BET) equation and non-local density functional theory (NLDFT) model. Fourier transform infrared spectroscopy (FT-IR) spectrum were obtained from a Nicolet 6700 spectrophotometer ranging from 4000 to 400 cm<sup>-1</sup> by using KBr pellets. <sup>1</sup>H NMR spectra were identified on a Bruker Avance III HD 400 MHz spectrometer with the solvent D<sub>2</sub>O and internal reference tetramethylsilane (TMS) at room temperature. Solid-state <sup>13</sup>C CP/MAS NMR was registered in a Bruker 400M with 12 kHz spinning rate. The crystal phase of synthesized

samples was identified by X-ray diffraction (XRD, Bruker AXS D8-Focus, Germany) with Cu K $\alpha$  radiation over the range of  $2\theta$  from  $5^\circ$  to  $70^\circ$ . A Netzsch STA 449 F3 thermogravimeter was employed to provide Thermogravimetric analysis (TGA) from 30 to 700  $^\circ\text{C}$  at the heating rate of 10 K  $\text{min}^{-1}$  under dry air. The content of C, H, N elements and their distribution were obtained from a CHN elemental mode of Vario EL cube and elemental mapping in scanning electron microscope (SEM), respectively. SEM was characterized the morphologies and structures of the samples by a SU8010 model Hitachi microscope. The DFT calculations was performed on BIOVIA Materials Studio 2017, the geometry optimizations were conducted by using the GGA-PW91 functional together with the Effective Core Potentials core treatment and DNP basis set.

### XRD and TGA of N<sub>4</sub>-PIL-2

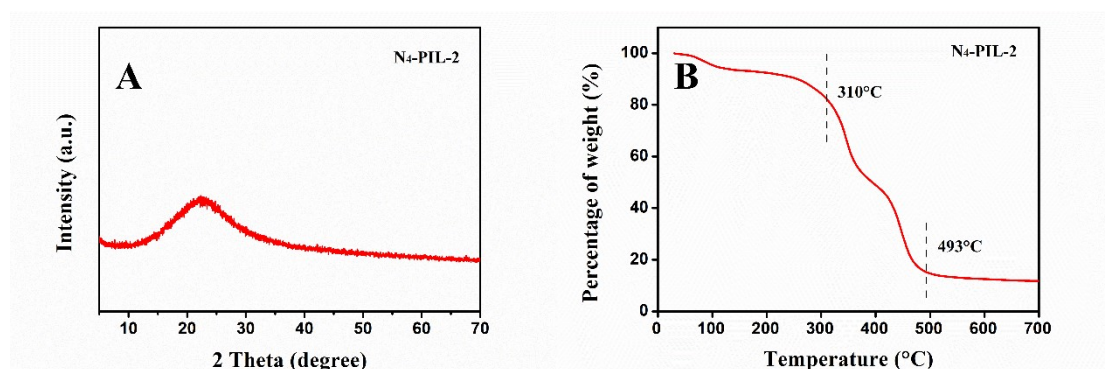

**Fig. S1.** (A) XRD patterns of the N<sub>4</sub>-PIL-2; (B) TGA curves of N<sub>4</sub>-PIL-2.

## The $^1\text{H}$ NMR spectra

$^1\text{H}$  NMR of crude product of chloropropene carbonate (containing 10 mol % mesitylene)

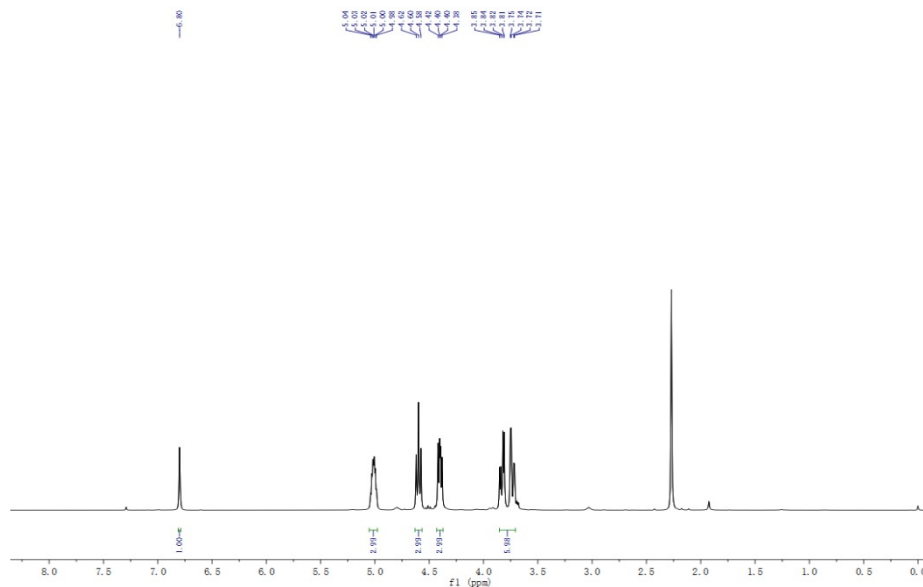

$^1\text{H}$  NMR of crude product of cyclic carbonate from 2-(bromomethyl)oxirane (containing 10 mol % mesitylene)

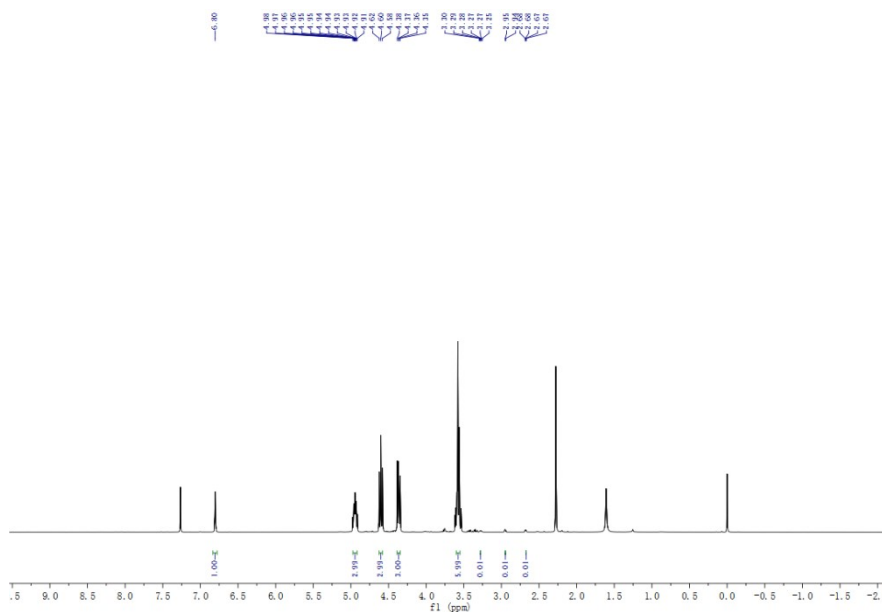

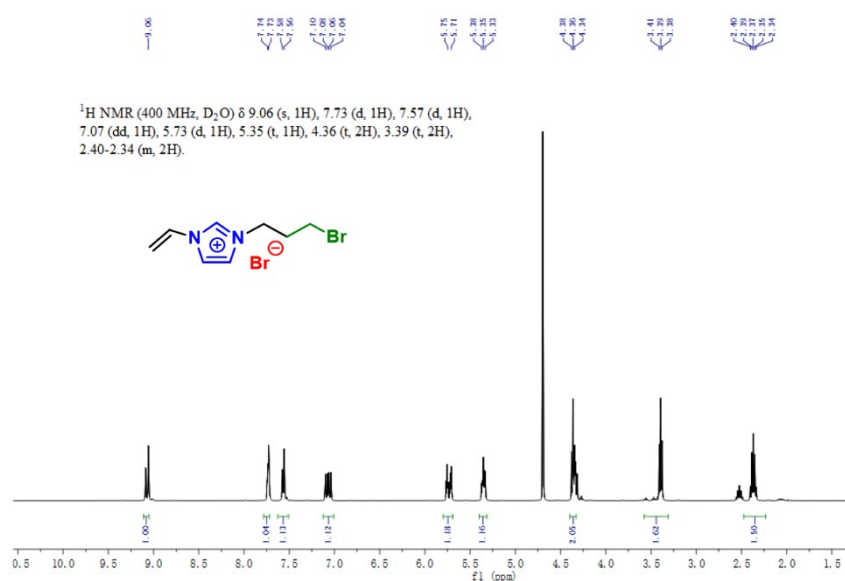

**Fig. S2.** <sup>1</sup>H NMR spectrum of VIMBr in D<sub>2</sub>O (Scheme 1).

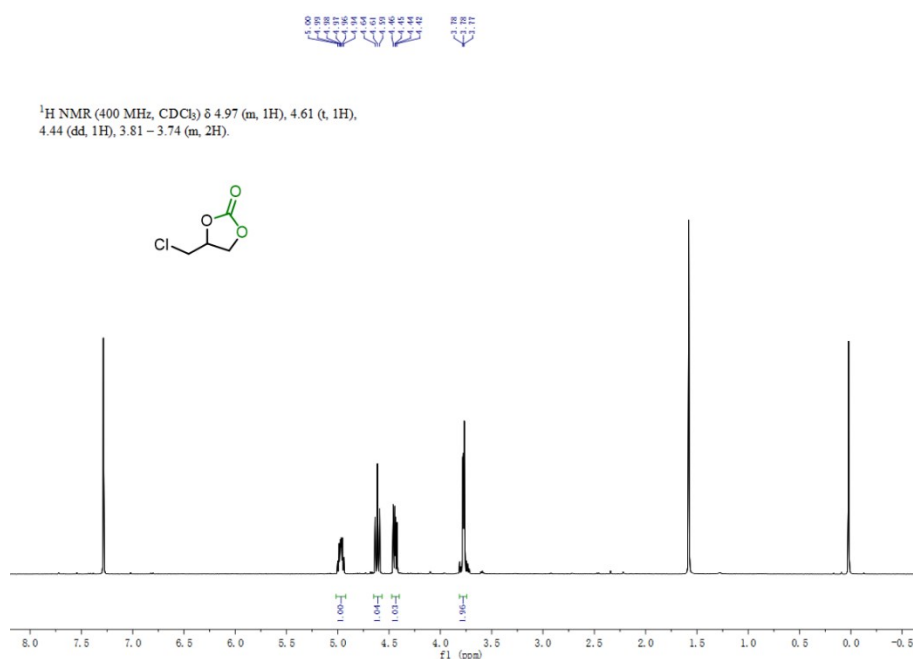

**Fig. S3.** Crude <sup>1</sup>H NMR spectrum of cyclic carbonate from epichlorohydrin in CDCl<sub>3</sub> (Table 4, entry 1).



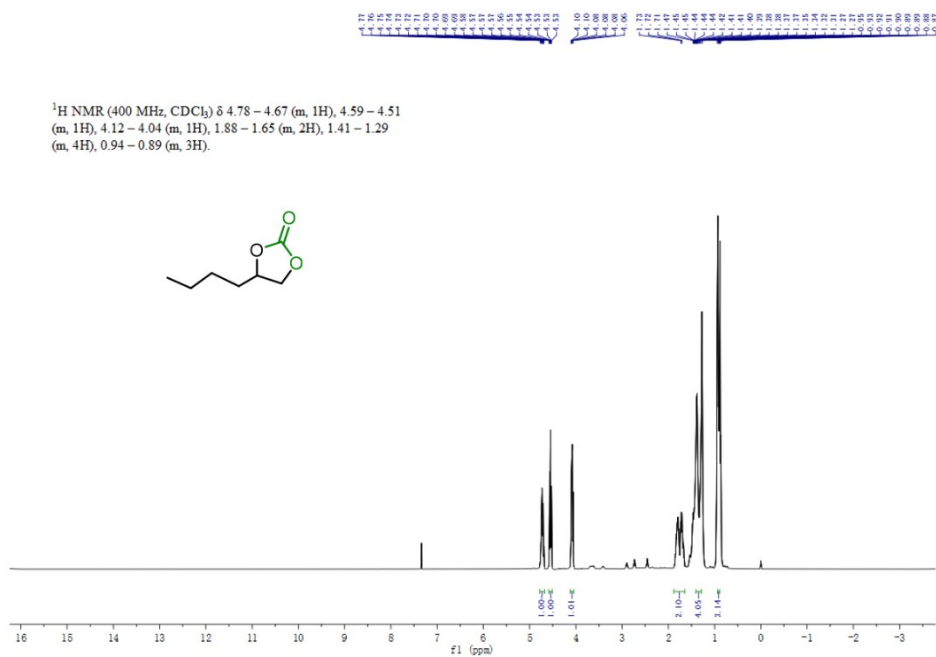

**Fig. S6.** Crude <sup>1</sup>H NMR spectrum of cyclic carbonate from 1,2-epoxyhexane in CDCl<sub>3</sub> (Table 4, entry 5).

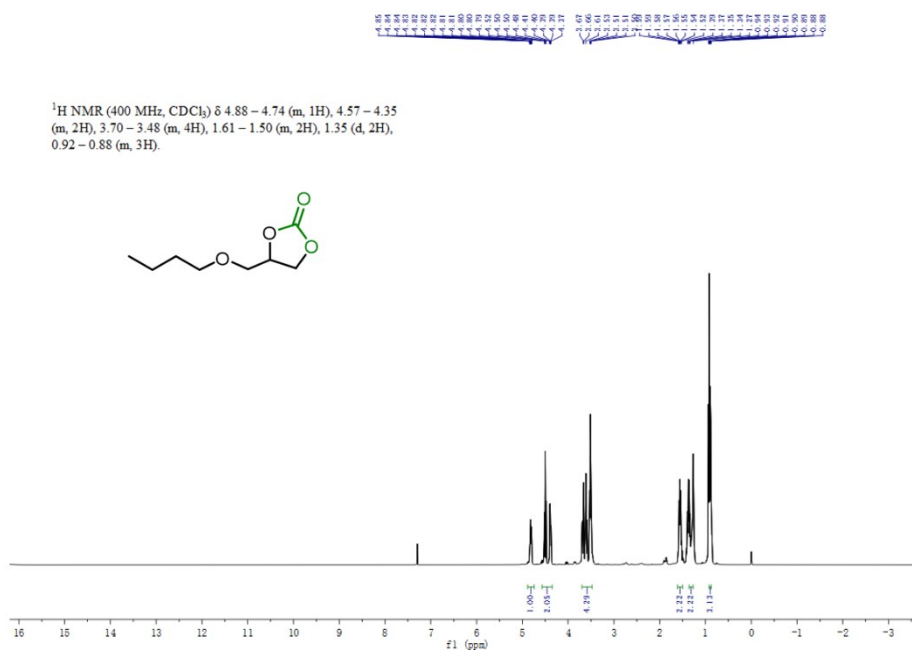

**Fig. S7.** Crude <sup>1</sup>H NMR spectrum of cyclic carbonate from butyl glycidyl ether in CDCl<sub>3</sub> (Table 4, entry 6).

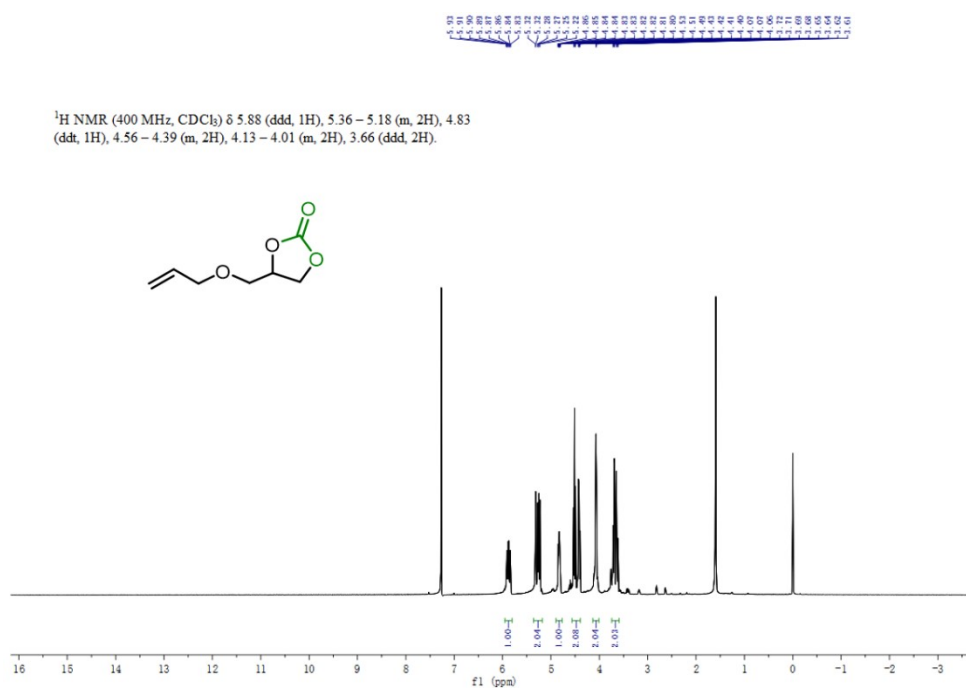

**Fig. S8.** Crude <sup>1</sup>H NMR spectrum of cyclic carbonate from allyl glycidyl ether in CDCl<sub>3</sub> (Table 4, entry 7).

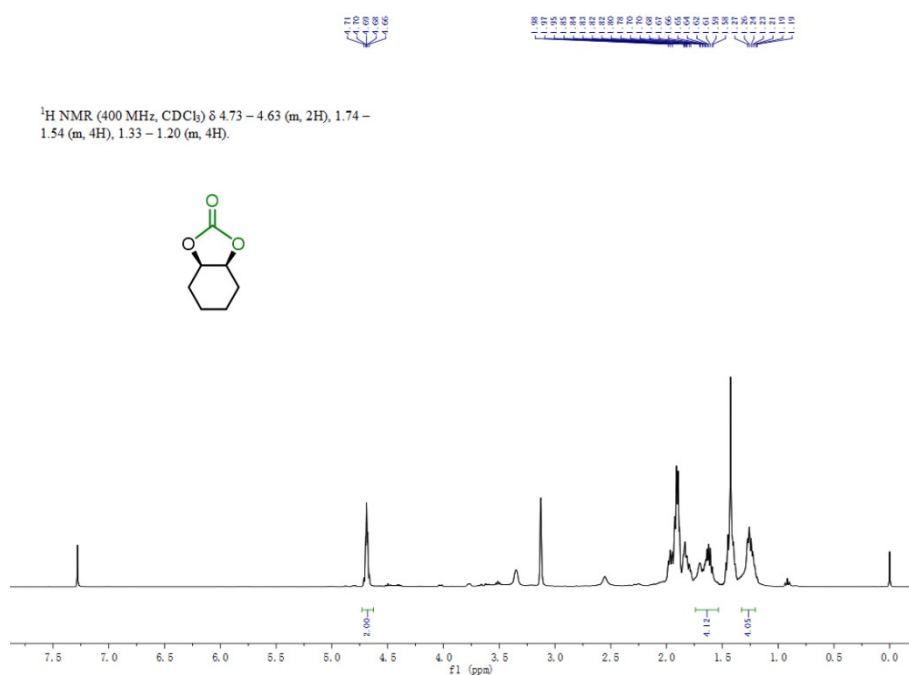

**Fig. S9.** Crude <sup>1</sup>H NMR spectrum of cyclic carbonate from cyclohexene oxide in CDCl<sub>3</sub> (Table 4, entry 8).

## Comparisons of the catalytic activity of N<sub>4</sub>-PIL-2.

**Table S1. The heterogeneous catalysts for the cycloaddition reactions of epichlorohydrin and CO<sub>2</sub> at ambient pressure (0.1 MPa).**

| Catalyst                   | Catalyst Amount   | Epoxide Amount   | <i>T</i> (°C) | <i>t</i> (h) | <i>P</i> (MPa) | Con. (TOF) <sup>a</sup> (%) | Ref.             |
|----------------------------|-------------------|------------------|---------------|--------------|----------------|-----------------------------|------------------|
| UIIP                       | 0.150 mmol        | 38.4 mmol        | 110           | 21           | 0.1            | 98.0 ( <b>11.9</b> )        | S1               |
| IP-1                       | 0.300 mmol        | 10.0 mmol        | 100           | 18           | 0.1            | 76.0 ( <b>1.41</b> )        | S2               |
| Ionization imidazole MOF   | 0.052 mmol        | 10.0 mmol        | 120           | 24           | 0.1            | 93.0 ( <b>7.45</b> )        | S3               |
| CCTF-350                   | 10.0 mg           | 10.0 mmol        | 120           | 24           | 0.1            | 95.0 ( <b>18.8</b> )        | S4               |
| PEAMCl                     | 100.0 mg          | 10.0 mmol        | 120           | 8            | 0.1            | 93.3 ( <b>10.7</b> )        | S5               |
| DB10%- Pa-Tp               | 0.011 mmol        | 5.0 mmol         | 120           | 96           | 0.1            | 99.0 ( <b>4.40</b> )        | S6               |
| PVIm-6-SCD                 | 0.5 mol %         | 10.0 mmol        | 50            | 24           | 0.1            | 98.2 ( <b>1.40</b> )        | S7               |
| CPP-IL                     | 30.0 mg           | 12.7 mmol        | 100           | 24           | 0.1            | 99.0 ( <b>4.00</b> )        | S8               |
| <b>N<sub>4</sub>-PIL-2</b> | <b>0.012 mmol</b> | <b>12.7 mmol</b> | <b>100</b>    | <b>24</b>    | <b>0.1</b>     | <b>98.0 (42.4)</b>          | <b>This work</b> |

<sup>a</sup> parantheses are TOF (h<sup>-1</sup>) values calculated with the help of reported data.



**Table S2. The heterogeneous catalysts for the cycloaddition reactions of epichlorohydrin and CO<sub>2</sub>.**

| Catalyst                                         | Catalyst Amount                            | Epoxide Amount   | <i>T</i> (°C) | <i>t</i> (h) | <i>P</i> (MPa) | Con. (%)    | Ref.             |
|--------------------------------------------------|--------------------------------------------|------------------|---------------|--------------|----------------|-------------|------------------|
| P(DMAEMA-EtOH)Br                                 | 50 mg                                      | 14.3 mmol        | 110           | 3            | 2.0            | 90.4        | S9               |
| PIM2                                             | 0.2 mol %                                  | 10.0 mmol        | 130           | 4            | 1.0            | 92.0        | S10              |
| V-PCIF-Br                                        | 2.9 mol %                                  | 5.0 mmol         | 100           | 6            | 1.0            | 98.0        | S11              |
| ZnTPy-BIM4/CNTs-3                                | Substrate/Catalyst=1450                    |                  | 120           | 2.5          | 1.5            | 98.0        | S12              |
| MIL-101(Cr)-(Alm) <sub>2</sub> ZnBr <sub>2</sub> | 100 mg                                     | 35.7 mmol        | 120           | 1            | 1.0            | 99.4        | S13              |
| 3-IPMP-EtI                                       | 0.5 mol %                                  | 30.0 mmol        | 90            | 5            | 1.0            | 90          | S14              |
| SBA16-PIL-Br                                     | 50.0 mg                                    | 5 mL             | 120           | 4            | 1.5            | 90.0        | S15              |
| PIL-4                                            | 20.0 mg                                    | 5.0 mmol         | 100           | 12           | 1.0            | 99.7        | S16              |
| HP-[BZPhIm]Cl-DCX-1                              | 30.0 mg                                    | 5.0 mmol         | 120           | 5            | 1.0            | 99.9        | S17              |
| PHUs                                             | [PHU urethane groups]/<br>[epoxide] = 0.20 |                  | 120           | 16           | 5.2            | 92.0        | S18              |
| PEAMCl                                           | 100.0 mg                                   | 10 mmol          | 120           | 2            | 1.0            | 98.7        | S5               |
| <b>N<sub>4</sub>-PIL-2</b>                       | <b>0.012 mmol</b>                          | <b>12.7 mmol</b> | <b>100</b>    | <b>4</b>     | <b>1.0</b>     | <b>99.6</b> | <b>This work</b> |

### Cartesian Coordinates (Å) of the Optimized Structures.

**Table S3. Cartesian Coordinates (Å) of the Optimized Structures.**

### Optimized Structures A

|   | x          | y         | z         |
|---|------------|-----------|-----------|
| N | -13.057202 | -1.461949 | -0.416622 |
| C | -11.686635 | -3.618786 | 0.188701  |
| C | -9.198194  | -3.081937 | -0.218757 |
| N | -9.051486  | -0.612187 | -1.052841 |
| C | -11.403086 | 0.341911  | -1.160603 |
| C | -15.711631 | -1.096954 | -0.294087 |
| C | -17.36152  | -2.828852 | 0.492939  |
| C | -6.750708  | 0.774275  | -1.810972 |
| C | -4.511218  | 0.387701  | -0.032802 |
| C | -2.542894  | 2.45409   | -0.517306 |
| N | -0.19335   | 2.034275  | 0.849162  |
| C | 1.414514   | 4.296798  | 0.719267  |
| C | 3.882209   | 4.037894  | 2.183051  |
| N | 5.861368   | 2.753066  | 0.77685   |
| C | 8.362429   | 3.082001  | 1.880045  |
| C | 10.449075  | 1.939376  | 0.265153  |
| N | 10.464217  | -0.823013 | 0.385918  |
| C | 12.521627  | -1.939148 | -1.095329 |
| C | 12.530725  | -4.821367 | -0.84917  |
| N | 10.255129  | -6.096997 | -1.752778 |
| H | -12.578155 | -5.331613 | 0.847635  |
| H | -7.53603   | -4.242964 | 0.0253    |
| H | -11.900901 | 2.235461  | -1.740357 |
| H | -16.279606 | 0.776101  | -0.911372 |
| H | -16.830889 | -4.708247 | 1.126754  |
| H | -19.359104 | -2.361059 | 0.520094  |
| H | -7.285887  | 2.775296  | -1.861309 |
| H | -6.267835  | 0.200346  | -3.744613 |
| H | -3.635947  | -1.472248 | -0.328336 |
| H | -5.153935  | 0.477881  | 1.941775  |
| H | -3.420081  | 4.309809  | -0.053493 |
| H | -2.093265  | 2.523969  | -2.549548 |
| H | -0.593308  | 1.698775  | 2.71133   |
| H | 0.38994    | 5.985785  | 1.420316  |
| H | 1.880156   | 4.647863  | -1.274299 |
| H | 3.493479   | 3.18431   | 4.066632  |
| H | 4.573089   | 5.958367  | 2.575395  |
| H | 5.472074   | 0.881036  | 0.53009   |
| H | 8.513128   | 2.317746  | 3.832653  |
| H | 8.706575   | 5.125739  | 2.03975   |
| H | 12.281612  | 2.761216  | 0.865729  |
| H | 10.149294  | 2.501121  | -1.713199 |

|   |           |           |           |
|---|-----------|-----------|-----------|
| H | 10.695398 | -1.349062 | 2.233599  |
| H | 14.39591  | -1.183138 | -0.533415 |
| H | 12.233852 | -1.407809 | -3.08752  |
| H | 12.810777 | -5.317474 | 1.155794  |
| H | 14.174668 | -5.584504 | -1.858038 |
| H | 10.173577 | -5.995897 | -3.677275 |
| H | 8.718044  | -5.127005 | -1.099893 |

### Optimized Structures B

|   | x          | y         | z         |
|---|------------|-----------|-----------|
| N | -7.224333  | 4.473169  | 1.746283  |
| C | -6.001194  | 2.587608  | 0.385731  |
| C | -3.970545  | 3.675414  | -0.76613  |
| N | -3.953079  | 6.203324  | -0.117945 |
| C | -5.93144   | 6.658383  | 1.413634  |
| C | -9.455206  | 4.24577   | 3.218247  |
| C | -10.920701 | 2.197026  | 3.277716  |
| C | -2.024806  | 8.066139  | -0.875842 |
| C | 0.244377   | 8.139001  | 0.907162  |
| C | 2.236175   | 9.993393  | -0.061428 |
| N | 4.504375   | 9.981441  | 1.506107  |
| C | 6.36285    | 11.843182 | 0.584911  |
| C | 8.792965   | 11.888575 | 2.140132  |
| N | 10.682539  | 10.11054  | 1.245688  |
| C | 13.124706  | 10.385389 | 2.478084  |
| C | 15.100533  | 8.583658  | 1.415456  |
| N | 14.571272  | 5.976657  | 2.146558  |
| C | 16.276179  | 4.087426  | 1.07112   |
| C | 15.319708  | 1.421688  | 1.680652  |
| N | 12.818339  | 0.834116  | 0.649602  |
| H | -6.665254  | 0.659626  | 0.35933   |
| H | -2.545096  | 2.866069  | -1.987115 |
| H | -6.439913  | 8.468013  | 2.211006  |
| H | -9.860987  | 5.937065  | 4.30768   |
| H | -10.561456 | 0.50211   | 2.175412  |
| H | -12.581874 | 2.195822  | 4.4816    |
| H | -2.960529  | 9.909807  | -0.987528 |
| H | -1.441131  | 7.55815   | -2.796303 |
| H | 1.081213   | 6.246467  | 1.065249  |
| H | -0.388256  | 8.686149  | 2.810699  |
| H | 1.377763   | 11.903543 | -0.236555 |
| H | 2.80758    | 9.440837  | -1.98293  |
| H | 4.017983   | 10.482097 | 3.310051  |

|    |           |           |           |
|----|-----------|-----------|-----------|
| H  | 5.537283  | 13.7654   | 0.545918  |
| H  | 6.857864  | 11.347905 | -1.368282 |
| H  | 8.311656  | 11.648095 | 4.176653  |
| H  | 9.619906  | 13.789394 | 1.989045  |
| H  | 10.058292 | 8.281084  | 1.304179  |
| H  | 13.023655 | 10.125845 | 4.564178  |
| H  | 13.777052 | 12.337637 | 2.180039  |
| H  | 16.995183 | 9.225929  | 2.03203   |
| H  | 15.060839 | 8.692694  | -0.657809 |
| H  | 14.604303 | 5.836408  | 4.073948  |
| H  | 18.251502 | 4.302602  | 1.740736  |
| H  | 16.304337 | 4.359537  | -0.989941 |
| H  | 15.250975 | 1.204923  | 3.751646  |
| H  | 16.692134 | 0.022437  | 1.006711  |
| H  | 12.957498 | 0.517969  | -1.250489 |
| H  | 11.712486 | 2.414744  | 0.837153  |
| C  | 6.956207  | 3.992422  | 3.647062  |
| C  | 6.031588  | 3.093179  | 1.185341  |
| O  | 8.301745  | 4.58108   | 1.35399   |
| C  | 6.335164  | 0.393093  | 0.40184   |
| Cl | 6.301367  | 0.131785  | -3.009015 |
| H  | 7.925624  | 2.677912  | 4.908648  |
| H  | 6.019923  | 5.608196  | 4.52311   |
| H  | 4.46499   | 4.110791  | 0.30495   |
| H  | 4.766119  | -0.765655 | 1.09779   |
| H  | 8.147962  | -0.371748 | 1.052925  |

### Optimized Structures C

|   | x          | y         | z         |
|---|------------|-----------|-----------|
| N | -12.098996 | -1.904091 | 0.101906  |
| C | -10.584053 | -4.023003 | -0.229774 |
| C | -8.302668  | -3.200834 | -1.099637 |
| N | -8.429725  | -0.60082  | -1.306594 |
| C | -10.736224 | 0.154842  | -0.563148 |
| C | -14.637417 | -1.815036 | 0.969267  |
| C | -16.048564 | -3.84387  | 1.452551  |
| C | -6.373815  | 1.084262  | -2.146705 |
| C | -4.076208  | 0.967007  | -0.407223 |
| C | -2.112785  | 2.950188  | -1.150944 |
| N | 0.125229   | 2.817936  | 0.457348  |
| C | 1.803504   | 4.996782  | 0.020615  |
| C | 4.154754   | 4.92744   | 1.682683  |
| N | 6.150102   | 3.369749  | 0.627953  |

|   |            |           |           |
|---|------------|-----------|-----------|
| C | 8.436462   | 3.346015  | 2.1571    |
| C | 10.544071  | 1.85916   | 0.887238  |
| N | 9.890033   | -0.813514 | 0.644752  |
| C | 11.811734  | -2.304953 | -0.670711 |
| C | 10.896796  | -5.021351 | -1.067019 |
| N | 8.593506   | -5.268091 | -2.575632 |
| H | -11.233772 | -5.90866  | 0.201361  |
| H | -6.610928  | -4.244448 | -1.571108 |
| H | -11.409199 | 2.082103  | -0.527817 |
| H | -15.329694 | 0.104008  | 1.203647  |
| H | -15.399812 | -5.776769 | 1.205914  |
| H | -17.969094 | -3.589304 | 2.128104  |
| H | -7.167818  | 2.995502  | -2.207278 |
| H | -5.881076  | 0.548434  | -4.088039 |
| H | -3.213826  | -0.917489 | -0.462517 |
| H | -4.689795  | 1.288409  | 1.553806  |
| H | -3.011584  | 4.848861  | -1.104159 |
| H | -1.509218  | 2.645705  | -3.119907 |
| H | -0.447133  | 2.891155  | 2.30342   |
| H | 0.787255   | 6.799792  | 0.332469  |
| H | 2.404876   | 4.969647  | -1.9672   |
| H | 3.598757   | 4.369261  | 3.636157  |
| H | 4.893684   | 6.863952  | 1.842648  |
| H | 5.556314   | 1.557397  | 0.336121  |
| H | 8.114116   | 2.581558  | 4.090046  |
| H | 9.070331   | 5.310557  | 2.409829  |
| H | 12.323382  | 2.159462  | 1.950092  |
| H | 10.835369  | 2.617871  | -1.024667 |
| H | 9.614362   | -1.560454 | 2.406897  |
| H | 13.651748  | -2.313983 | 0.335953  |
| H | 12.144955  | -1.410132 | -2.519985 |
| H | 10.560136  | -5.892782 | 0.795652  |
| H | 12.408229  | -6.130661 | -1.955048 |
| H | 8.988912   | -4.853452 | -4.418501 |
| H | 7.3602     | -3.903097 | -1.982473 |
| C | 1.492552   | -2.4551   | 3.029985  |
| O | -0.694953  | -2.853063 | 3.120122  |
| O | 3.678694   | -2.099575 | 2.979467  |

## References

S1. M. A. Ziaee, Y. Tang, H. Zhong, D. Tian and R. Wang, *ACS Sustainable Chemistry & Engineering*, 2018, 7,

- 2380-2387.
- S2. Y. Zhang, E.-S. M. El-Sayed, K. Su, D. Yuan and Z. Han, *Journal of CO<sub>2</sub> Utilization*, 2020, **42**, 101301.
- S3. J. Liang, R. P. Chen, X. Y. Wang, T. T. Liu, X. S. Wang, Y. B. Huang and R. Cao, *Chem Sci*, 2017, **8**, 1570-1575.
- S4. T. T. Liu, R. Xu, J. D. Yi, J. Liang, X. S. Wang, P. C. Shi, Y. B. Huang and R. Cao, *ChemCatChem*, 2018, **10**, 2036-2040.
- S5. X. Wang, Q. Dong, Z. Xu, Y. Wu, D. Gao, Y. Xu, C. Ye, Y. Wen, A. Liu, Z. Long and G. Chen, *Chemical Engineering Journal*, 2021, **403**, 126460.
- S6. J. Cao, W. Shan, Q. Wang, X. Ling, G. Li, Y. Lyu, Y. Zhou and J. Wang, *ACS Appl Mater Interfaces*, 2019, **11**, 6031-6041.
- S7. Y. Xie, J. Liang, Y. Fu, M. Huang, X. Xu, H. Wang, S. Tu and J. Li, *Journal of Materials Chemistry A*, 2018, **6**, 6660-6666.
- S8. C. Cui, R. Sa, Z. Hong, H. Zhong and R. Wang, *ChemSusChem*, 2020, **13**, 180-187.
- S9. T. Ying, X. Tan, Q. Su, W. Cheng, L. Dong and S. Zhang, *Green Chemistry*, 2019, **21**, 2352-2361.
- S10. Y. Wang, J. Nie, C. Lu, F. Wang, C. Ma, Z. Chen and G. Yang, *Microporous and Mesoporous Materials*, 2020, **292**, 109751.
- S11. G. Chen, X. Huang, Y. Zhang, M. Sun, J. Shen, R. Huang, M. Tong, Z. Long and X. Wang, *Chemical Communications*, 2018, **54**, 12174-12177.
- S12. S. Jayakumar, H. Li, J. Chen and Q. Yang, *ACS Appl Mater Interfaces*, 2018, **10**, 2546-2555.
- S13. M. Zou, W. Dai, P. Mao, B. Li, J. Mao, S. Zhang, L. Yang, S. Luo, X. Luo and J. Zou, *Microporous and Mesoporous Materials*, 2021, **312**, 110750.
- S14. W. Zhang, Y. Mei, P. Wu, H.-H. Wu and M.-Y. He, *Catalysis Science & Technology*, 2019, **9**, 1030-1038.
- S15. R. Qu, Z. Ren, N. Li, F. Zhang, Z. J. Zhang and H. Zhang, *Journal of CO<sub>2</sub> Utilization*, 2020, **38**, 168-176.
- S16. H. Song, Y. Wang, M. Xiao, L. Liu, Y. Liu, X. Liu and H. Gai, *ACS Sustainable Chemistry & Engineering*, 2019, **7**, 9489-9497.
- S17. H. Song, Y. Wang, Y. Liu, L. Chen, B. Feng, X. Jin, Y. Zhou, T. Huang, M. Xiao, F. Huang and H. Gai, *ACS Sustainable Chemistry & Engineering*, 2021, **9**, 2115-2128.
- S18. S. Motokucho and H. Morikawa, *Chemical Communications*, 2020, **56**, 10678-10681.
